# Supplementary material for: A Comprehensive Comparative Analysis of Deep Learning Based Feature Representations for Molecular Taste Prediction
Source: MDPI journal article supplement (doi:10.3390/foods12183386), 2023-09-09
Supplement: s1 [file s1]

**Table S1.** Performance metrics of different classifier with Pubchem fingerprint for sweet taste.

| Model               | Accuracy | Precision | Sensitivity | Specificity | F1 score |
|---------------------|----------|-----------|-------------|-------------|----------|
| MLP+Pubchem         | 0.833    | 0.714     | 0.854       | 0.822       | 0.777    |
| SVM+Pubchem         | 0.854    | 0.815     | 0.742       | 0.912       | 0.776    |
| RF+Pubchem          | 0.867    | 0.819     | 0.787       | 0.909       | 0.802    |
| Naive Bayes+Pubchem | 0.712    | 0.563     | 0.708       | 0.713       | 0.627    |

**Table S2.** Performance metrics of different classifier with Pubchem fingerprint for bitter taste.

| Model               | Accuracy | Precision | Sensitivity | Specificity | F1 score |
|---------------------|----------|-----------|-------------|-------------|----------|
| MLP+Pubchem         | 0.879    | 0.886     | 0.845       | 0.907       | 0.865    |
| SVM+Pubchem         | 0.888    | 0.879     | 0.879       | 0.897       | 0.879    |
| RF+Pubchem          | 0.890    | 0.899     | 0.858       | 0.918       | 0.878    |
| Naive Bayes+Pubchem | 0.7      | 0.686     | 0.640       | 0.751       | 0.662    |

**Table S3.** Performance metrics of different classifier with Pubchem fingerprint for umami taste.

| Model               | Accuracy | Precision | Sensitivity | Specificity | F1 score |
|---------------------|----------|-----------|-------------|-------------|----------|
| MLP+Pubchem         | 0.994    | 0.944     | 0.895       | 0.998       | 0.919    |
| SVM+Pubchem         | 0.994    | 1         | 0.842       | 1           | 0.914    |
| RF+Pubchem          | 0.994    | 1         | 0.842       | 1           | 0.914    |
| Naive Bayes+Pubchem | 0.910    | 0.267     | 0.842       | 0.912       | 0.405    |

**Table S4.** Complexity of the utilized models.

| Model           | Number of modules | The number of parameters |
|-----------------|-------------------|--------------------------|
| Morgan          | 11                | 1477185                  |
| Pubchem         | 11                | 1330753                  |
| Daylight        | 11                | 2525761                  |
| Rdkit           | 11                | 633409                   |
| ESPF            | 11                | 3076673                  |
| ErG             | 11                | 751169                   |
| CNN             | 11                | 226625                   |
| CNN_GRU         | 12                | 3124033                  |
| CNN_LSTM        | 12                | 3169601                  |
| GCN             | 29                | 191810                   |
| NeuralFP        | 85                | 480193                   |
| GIN_AttrMasking | 59                | 2067053                  |
| GIN_ContextPred | 59                | 2067053                  |
| AttentiveFP     | 63                | 300806                   |

**Table S5.** Performance on training set of 14 models for sweet taste.

| Model    | Accuracy | Precision | Sensitivity | Specificity | F1 score |
|----------|----------|-----------|-------------|-------------|----------|
| Morgan   | 0.998    | 0.995     | 1           | 0.997       | 0.998    |
| Pubchem  | 0.940    | 0.936     | 0.889       | 0.967       | 0.911    |
| Daylight | 0.968    | 0.980     | 0.928       | 0.990       | 0.953    |
| RDKit    | 0.956    | 0.988     | 0.886       | 0.994       | 0.934    |
| ESPF     | 0.997    | 0.997     | 0.995       | 0.998       | 0.996    |

|                 |       |       |       |       |       |
|-----------------|-------|-------|-------|-------|-------|
| ErG             | 0.907 | 0.849 | 0.893 | 0.915 | 0.871 |
| CNN             | 0.954 | 0.899 | 0.980 | 0.941 | 0.938 |
| CNN_GRU         | 0.871 | 0.881 | 0.730 | 0.947 | 0.798 |
| CNN_LSTM        | 0.842 | 0.814 | 0.710 | 0.913 | 0.758 |
| GCN             | 0.914 | 0.881 | 0.871 | 0.937 | 0.876 |
| NeuralFP        | 0.897 | 0.957 | 0.739 | 0.982 | 0.834 |
| GIN_AttrMasking | 0.856 | 0.771 | 0.837 | 0.867 | 0.803 |
| GIN_ContextPred | 0.826 | 0.723 | 0.816 | 0.832 | 0.767 |
| AttentiveFP     | 0.802 | 0.767 | 0.622 | 0.899 | 0.687 |

**Table S6.** Performance on training set of 14 models for bitter taste.

| Model           | Accuracy | Precision | Sensitivity | Specificity | F1 score |
|-----------------|----------|-----------|-------------|-------------|----------|
| Morgan          | 0.997    | 0.995     | 0.999       | 0.996       | 0.997    |
| Pubchem         | 0.960    | 0.987     | 0.917       | 0.991       | 0.951    |
| Daylight        | 0.982    | 0.972     | 0.986       | 0.979       | 0.979    |
| RDKit           | 0.976    | 0.984     | 0.959       | 0.988       | 0.972    |
| ESPF            | 0.999    | 1         | 0.997       | 1           | 0.999    |
| ErG             | 0.946    | 0.965     | 0.907       | 0.975       | 0.935    |
| CNN             | 0.987    | 0.986     | 0.985       | 0.989       | 0.985    |
| CNN_GRU         | 0.928    | 0.897     | 0.939       | 0.919       | 0.917    |
| CNN_LSTM        | 0.884    | 0.948     | 0.766       | 0.970       | 0.847    |
| GCN             | 0.951    | 0.940     | 0.944       | 0.956       | 0.942    |
| NeuralFP        | 0.947    | 0.991     | 0.882       | 0.994       | 0.933    |
| GIN_AttrMasking | 0.901    | 0.970     | 0.789       | 0.982       | 0.870    |
| GIN_ContextPred | 0.901    | 0.976     | 0.785       | 0.986       | 0.870    |
| AttentiveFP     | 0.852    | 0.877     | 0.757       | 0.922       | 0.812    |

**Table S7.** Performance on training set of 14 models for umami taste.

| Model           | Accuracy | Precision | Sensitivity | Specificity | F1 score |
|-----------------|----------|-----------|-------------|-------------|----------|
| Morgan          | 1        | 1         | 1           | 1           | 1        |
| Pubchem         | 1        | 1         | 1           | 1           | 1        |
| Daylight        | 0.999    | 0.986     | 1           | 0.999       | 0.993    |
| RDKit           | 1        | 1         | 1           | 1           | 1        |
| ESPF            | 1        | 1         | 1           | 1           | 1        |
| ErG             | 0.999    | 1         | 0.972       | 1           | 0.986    |
| CNN             | 0.993    | 1         | 0.817       | 1           | 0.899    |
| CNN_GRU         | 0.983    | 0.744     | 0.859       | 0.988       | 0.797    |
| CNN_LSTM        | 0.990    | 1         | 0.732       | 1           | 0.846    |
| GCN             | 0.997    | 1         | 0.930       | 1           | 0.964    |
| NeuralFP        | 0.999    | 0.973     | 1           | 0.999       | 0.986    |
| GIN_AttrMasking | 0.993    | 0.845     | 1           | 0.993       | 0.916    |
| GIN_ContextPred | 0.992    | 0.843     | 0.986       | 0.993       | 0.909    |
| AttentiveFP     | 0.987    | 0.885     | 0.761       | 0.996       | 0.818    |
